# Supplementary material for: PA1b-like peptides alleviate mitochondrial dysfunction induced by glucose toxicity through interaction with VDAC1 in β-cells
Source: Royal Society of Chemistry journal article supplement (doi:10.1039/d5fo00054h), 2025-01-01
Supplement: d5fo00054h1.pdf [file d5fo00054h1.pdf]

- 1 **Figure S1.** Docking analysis of PA1b-like peptides with VDAC1.
- 2 **Figure S2.** Secondary structure analysis of AG/VG-VDAC1 complexes.
- 3 **Figure S3.** Preparation of his-VG and FITC-VG

4  
5  
6  
7

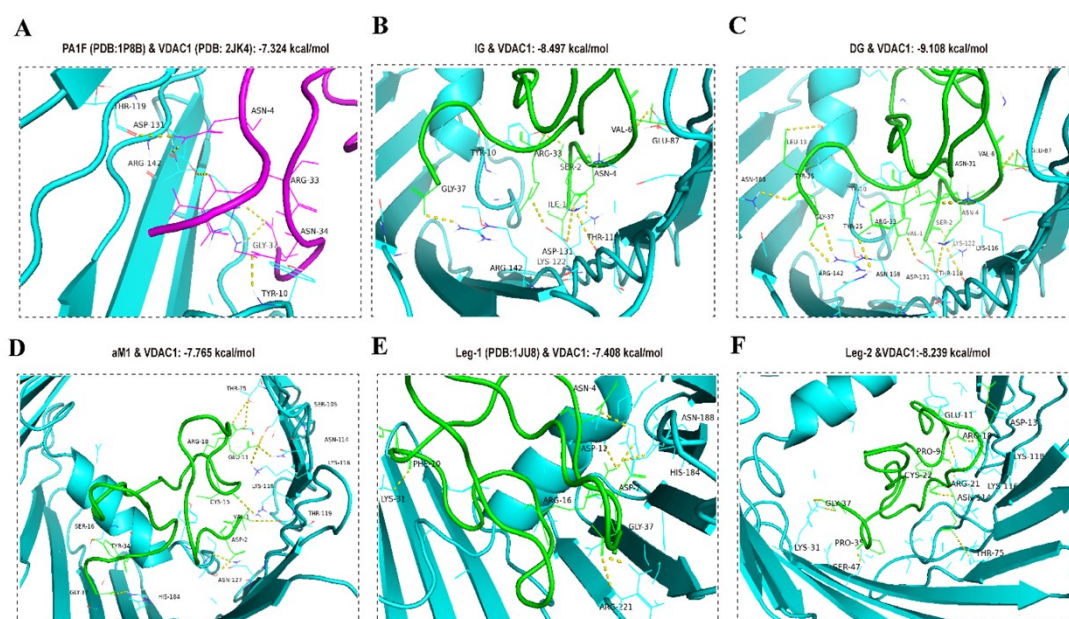

- 8  
9 **Fig. S1** Docking analysis of PA1b-like peptides with VDAC1.  
10  
11

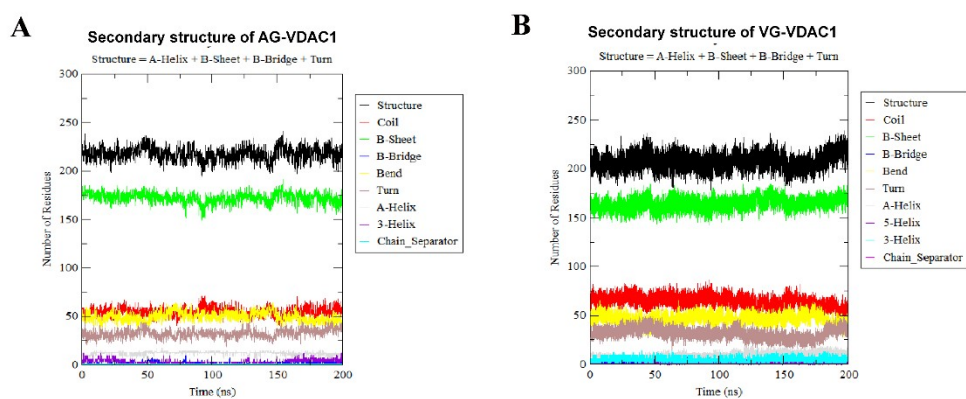

- 12  
13 **Fig. S2** Secondary structure analysis of AG/VG-VDAC1 complexes.  
14  
15

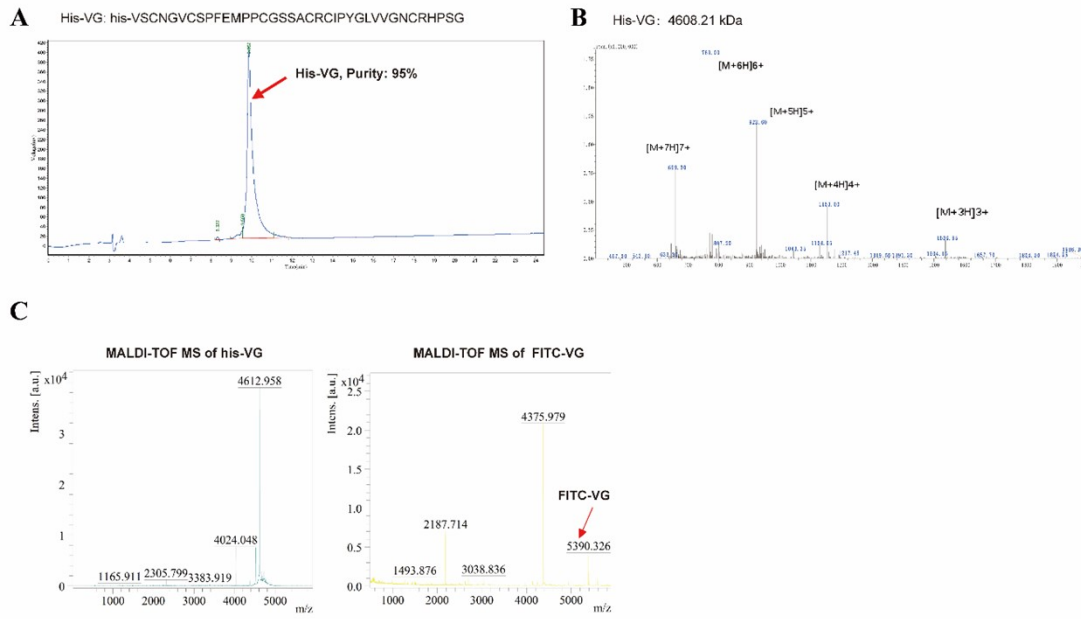

16

17 **Fig. S3** Preparation of his-VG and FITC-VG. A. HPLC diagram of synthesized his-VG. B. LC-MS  
 18 diagram of synthesized his-VG. C. His-VG and FITC-VG was detected by MALDI-TOF MS.

19

20
